# Supplementary material for: Ultrathin Au nanowires supported on rGO/TiO2 as an efficient photoelectrocatalyst
Source: Royal Society of Chemistry journal article supplement (doi:10.1039/c5ta03988f), 2015-01-01
Supplement: c5ta03988f1.pdf [file c5ta03988f1.pdf]

## Supplementary information

### Ultrathin Au nanowires supported on RGO/TiO<sub>2</sub> as an efficient photoelectrocatalyst

A Leelavathi,<sup>a</sup> Giridhar Madras<sup>b</sup> and N Ravishankar<sup>c\*</sup>

<sup>a</sup> Centre for Nanoscience and Engineering, Indian Institute of Science, Bangalore-560012, India.

<sup>b</sup> Department of Chemical Engineering, Indian Institute of Science, Bangalore-560012, India.

<sup>c</sup> Materials Research Centre, Indian Institute of Science, Bangalore-560012, India.

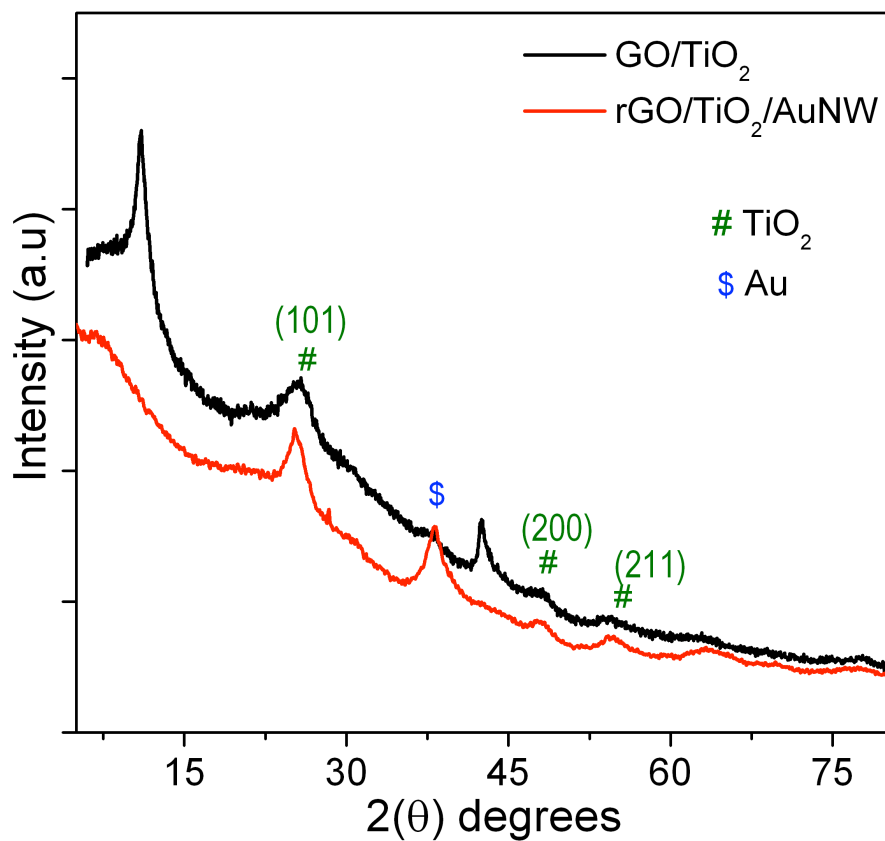

**Fig. S1** pXRD patterns of GO/TiO<sub>2</sub> before and after growth of Au nanowires. GO, basal spacing decreased from 8 Å to ~3.7 Å after incubating in nanowire growth solution, which validates that the room temperature reduction of GO.<sup>1</sup> Indexed phase corresponds to anatase TiO<sub>2</sub>.

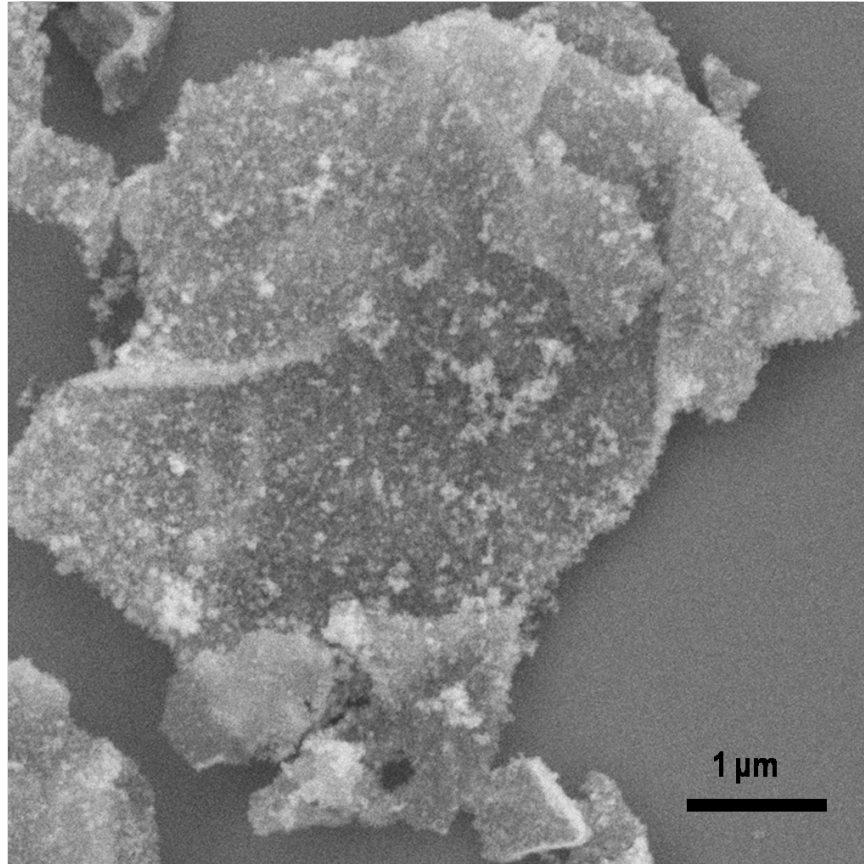

**Fig. S2** SEM micrograph of GO/TiO<sub>2</sub>, indicating that the heterogeneous nucleation of TiO<sub>2</sub> on sheets.

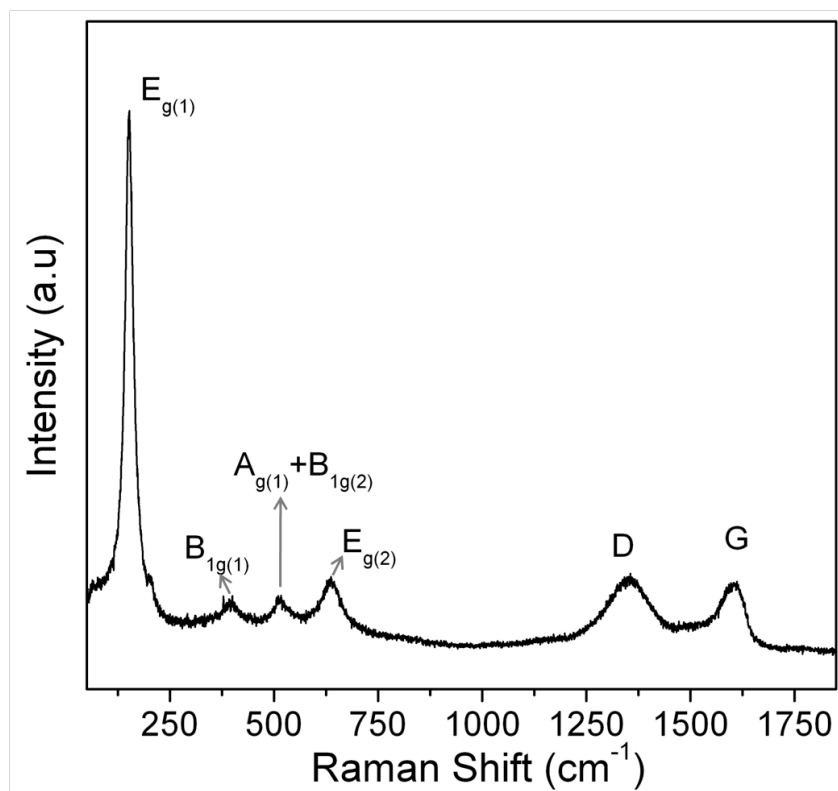

**Fig. S3** Raman spectrum of GO/TiO<sub>2</sub> synthesized through microwave, using titanil nitrate precursor. Shows the typical features of GO with the presence of D and G band. Appearance of Raman modes around 150 cm<sup>-1</sup> (E<sub>g(1)</sub>), 396 cm<sup>-1</sup> (B<sub>1g(1)</sub>), 513 cm<sup>-1</sup> (A<sub>1g</sub>+B<sub>1g(2)</sub>) and 639 cm<sup>-1</sup> (E<sub>g(2)</sub>) confirms the presence of anatase phase TiO<sub>2</sub> on GO sheets.<sup>2</sup>

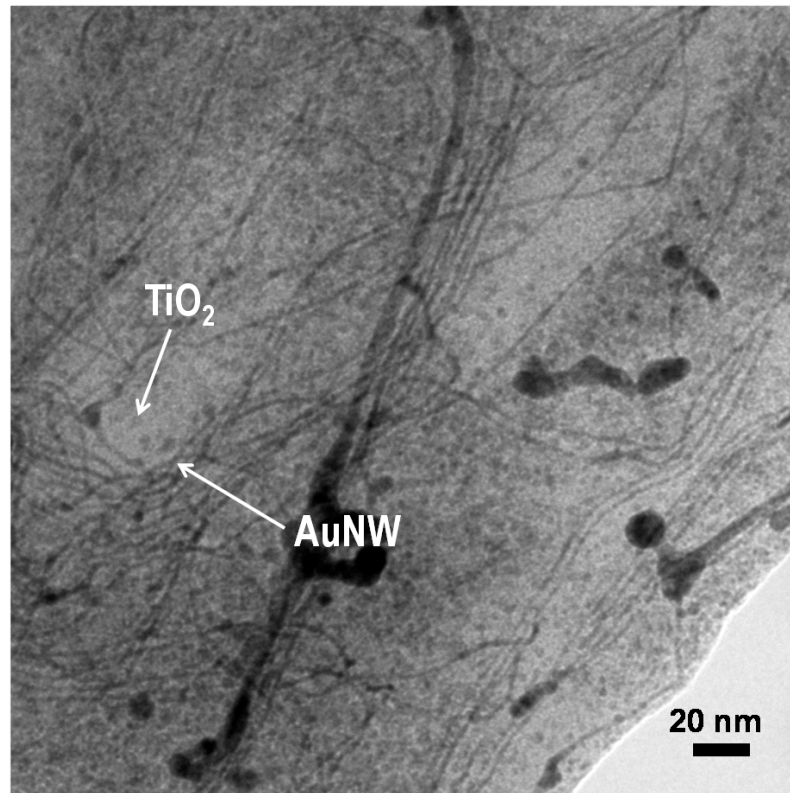

**Fig. S4** TEM micrograph of rGO/TiO<sub>2</sub>/AuNW, displays that the nanowires are dispersed on the support rGO/TiO<sub>2</sub>.

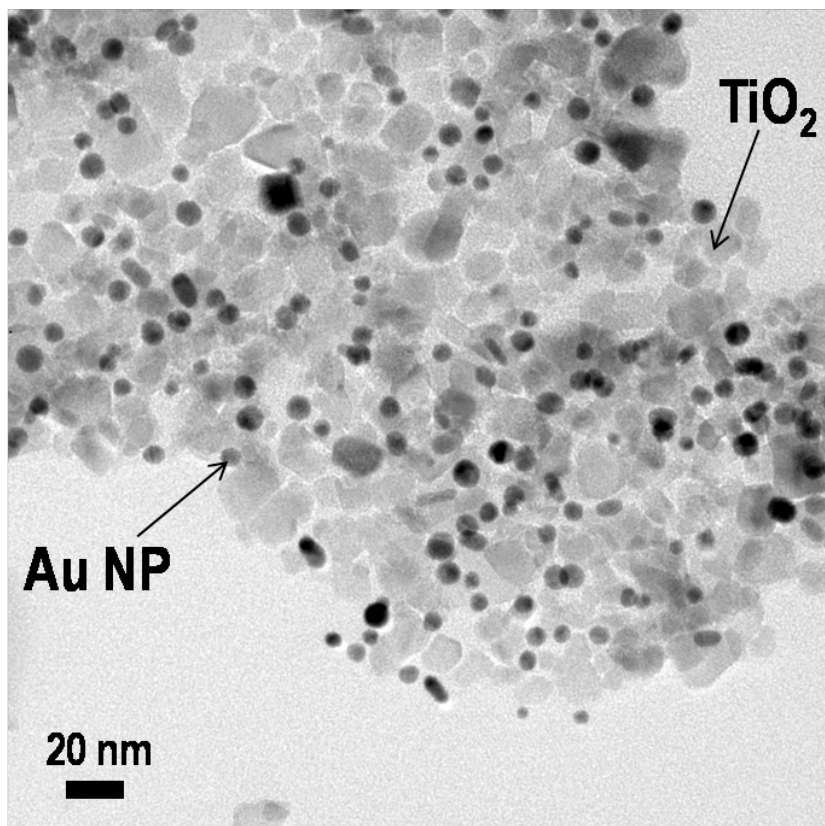

**Fig. S5** Bright field micrograph displays that unmodified TiO<sub>2</sub> favors for the Au nanoparticles formation.

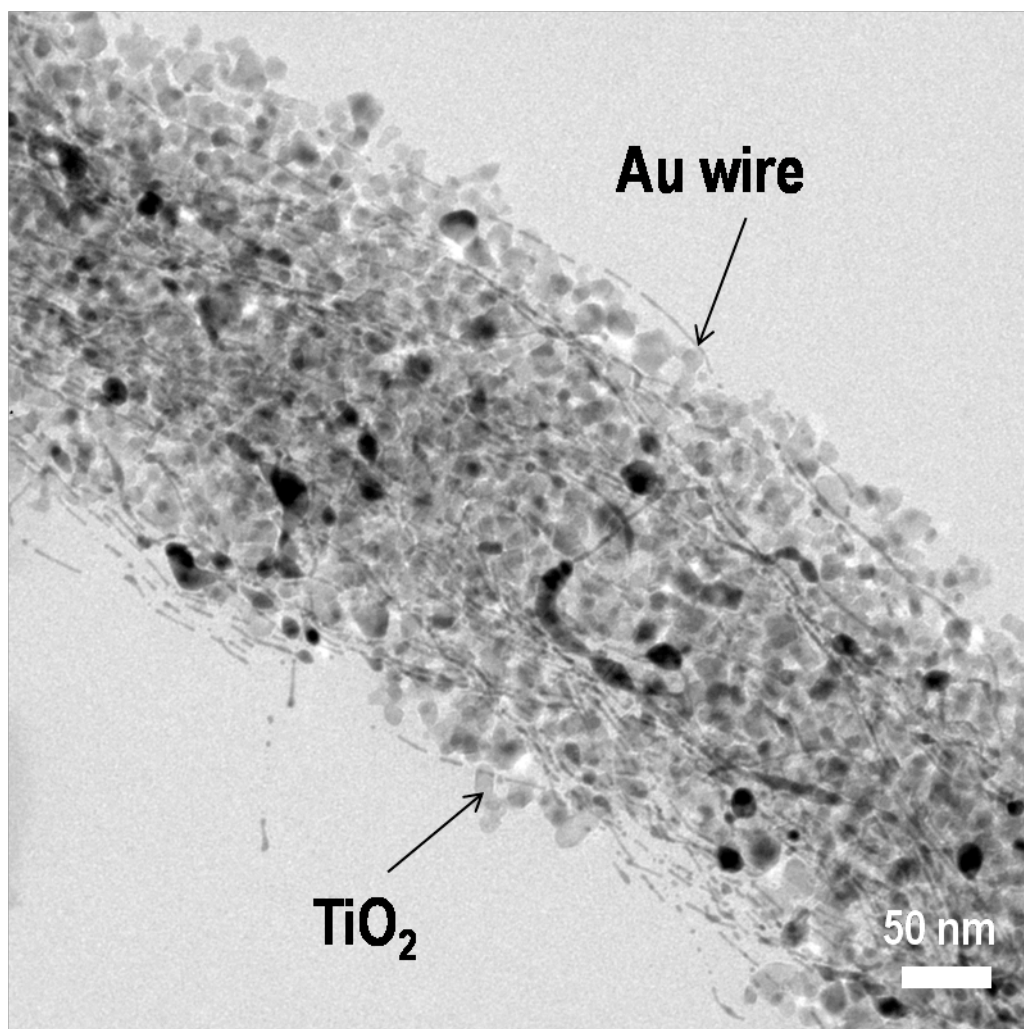

**Fig. S6** Bright field TEM image reveals the growth of nanowires on amine modified TiO<sub>2</sub> nanoparticles.

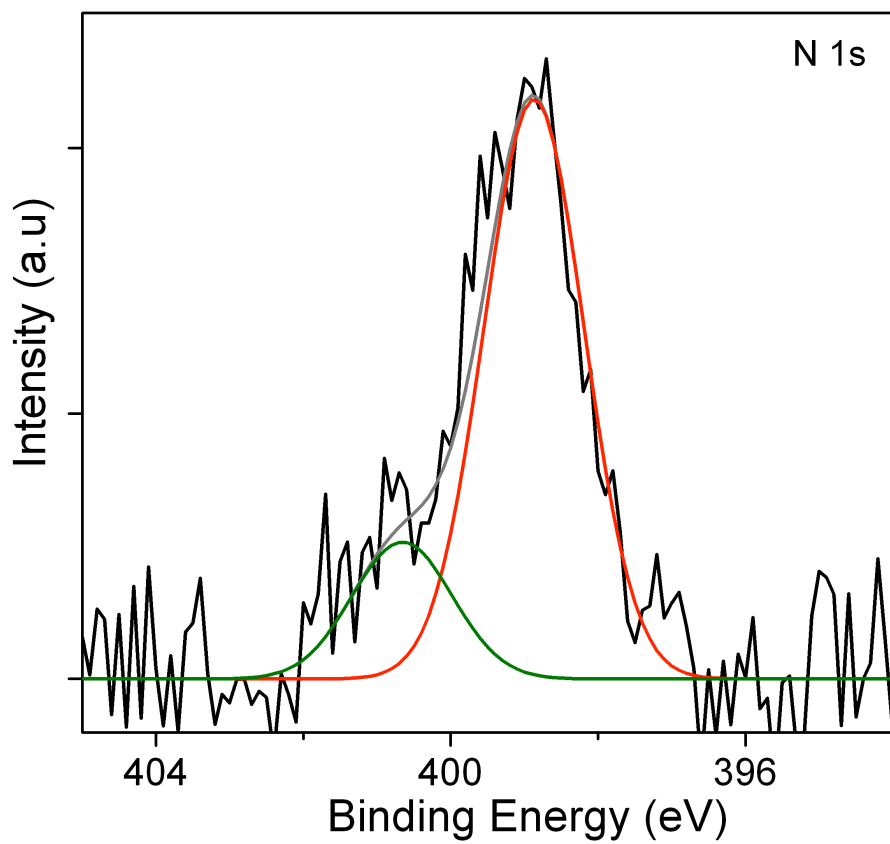

**Fig. S7** Deconvoluted N 1s spectra of rGO/TiO<sub>2</sub>/Au nanowires, displaying the existence of nitrogen species.



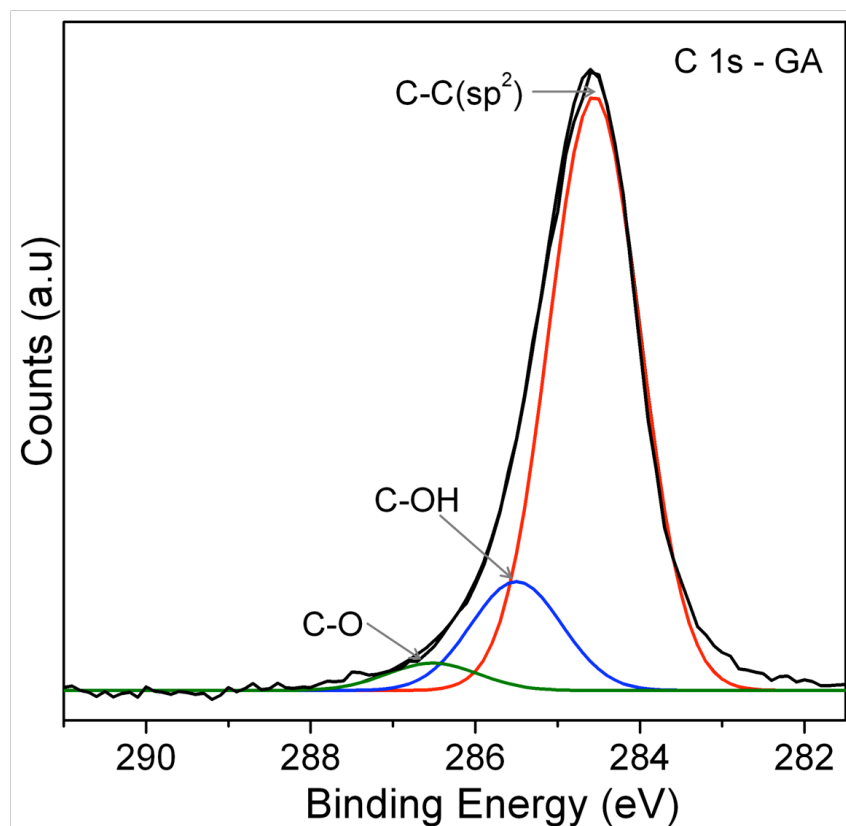

**Fig. S8** XPS C 1s of rGO/AuNW( GA), showing the room temperature reduction of GO after incubating with Au nanowires growth solution for 6 h.

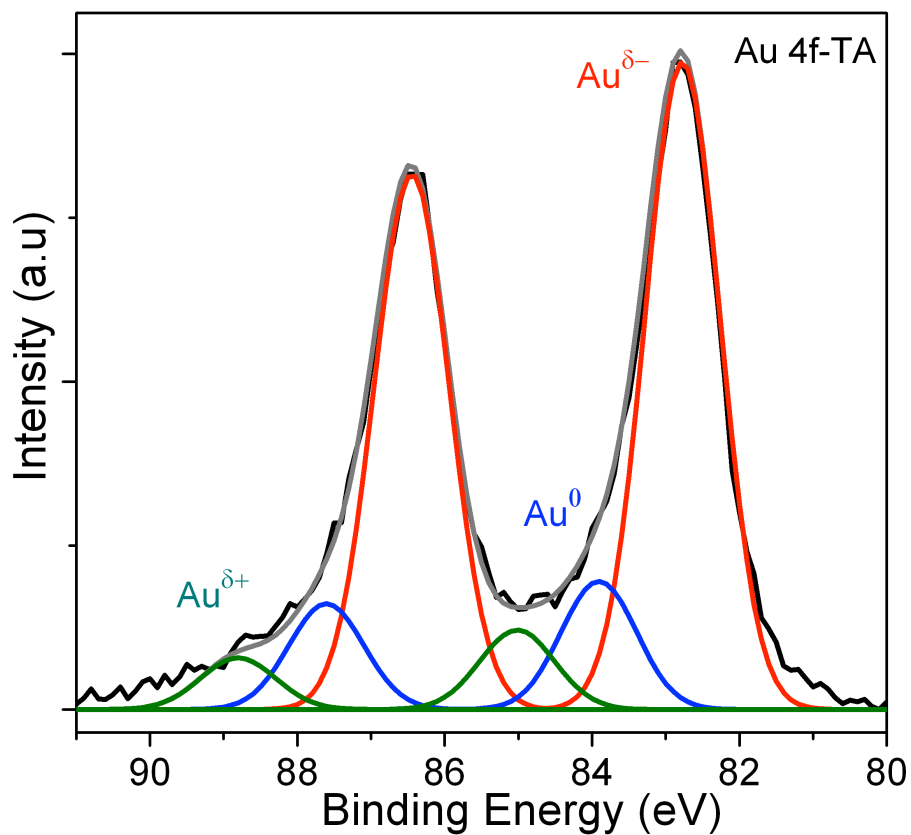

**Fig. S9** Deconvoluted Au 4f of TiO<sub>2</sub>/AuNW (TA) showing the presence of Au anionic species, predominantly electron-rich Au surface.

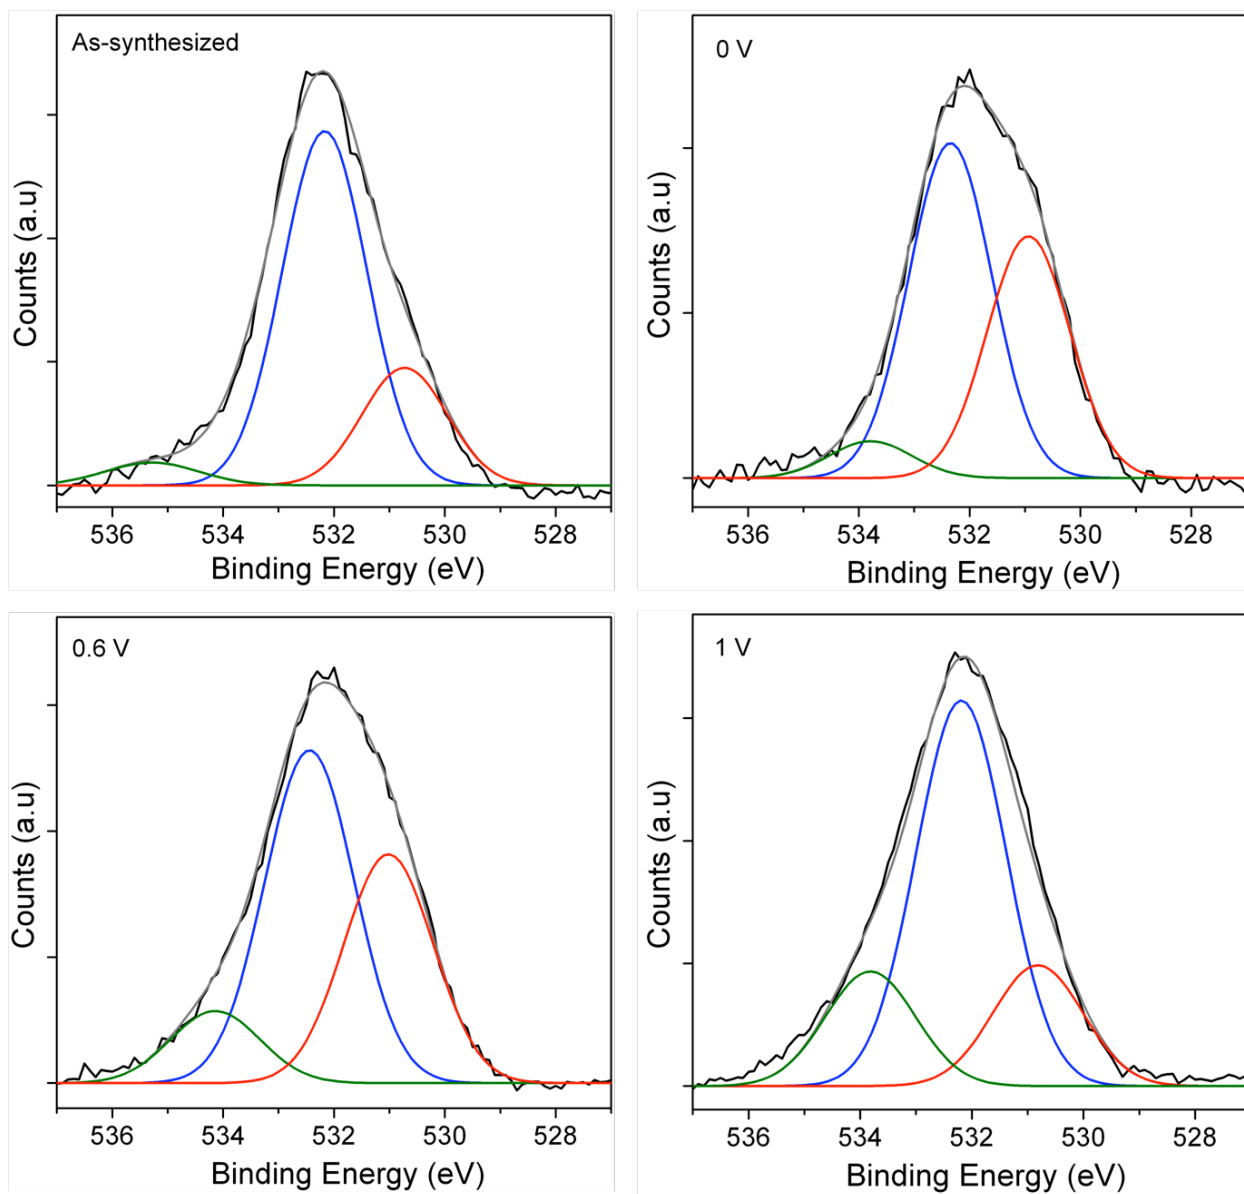

**Fig. S10** O 1s spectra of rGO/AuNW before (as-synthesized) and after CV scans at different positive potential limit. The fitted peaks are C=O at 530.7 eV, C-OH 532.2 at eV and -O-C at 534.4 eV. Indicates that compared to other oxygenated species, relative content of C=O (amide) drastically varies with respect to positive potential limit. The increase in C=O content at 0.6 V may be the reason for featureless voltammogram (absence of redox features).

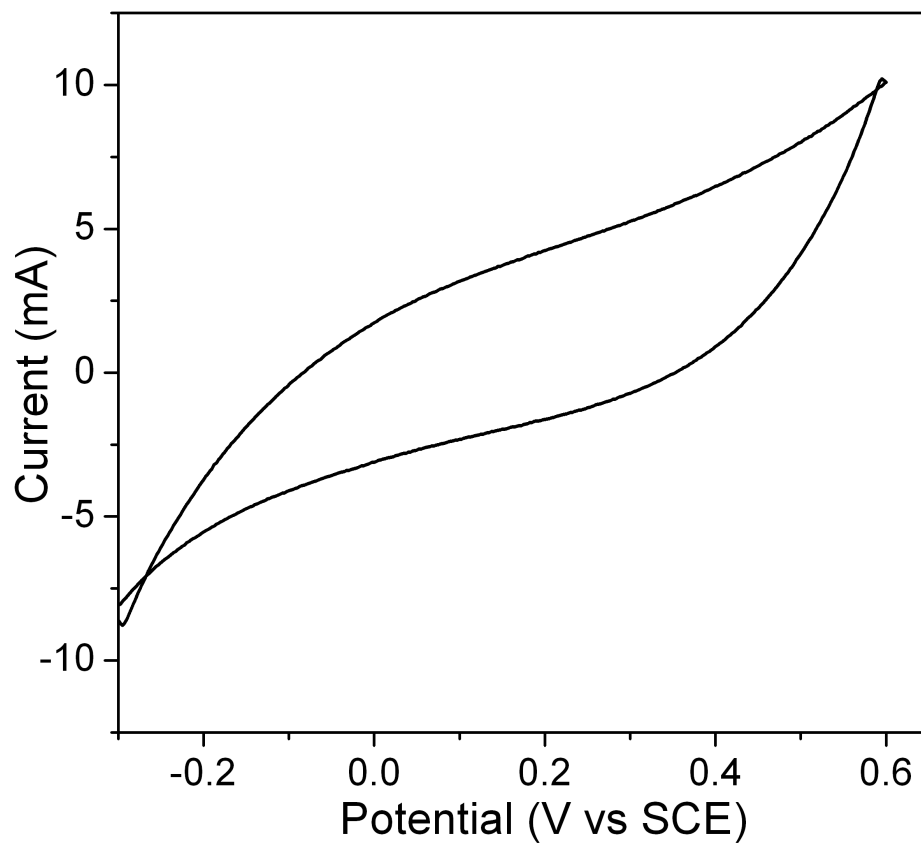

**Fig. S11** CV of GO/TiO<sub>2</sub> measured in 1M NaOH containing 1.5 M ethanol, showing the absence of ethanol oxidation peak.

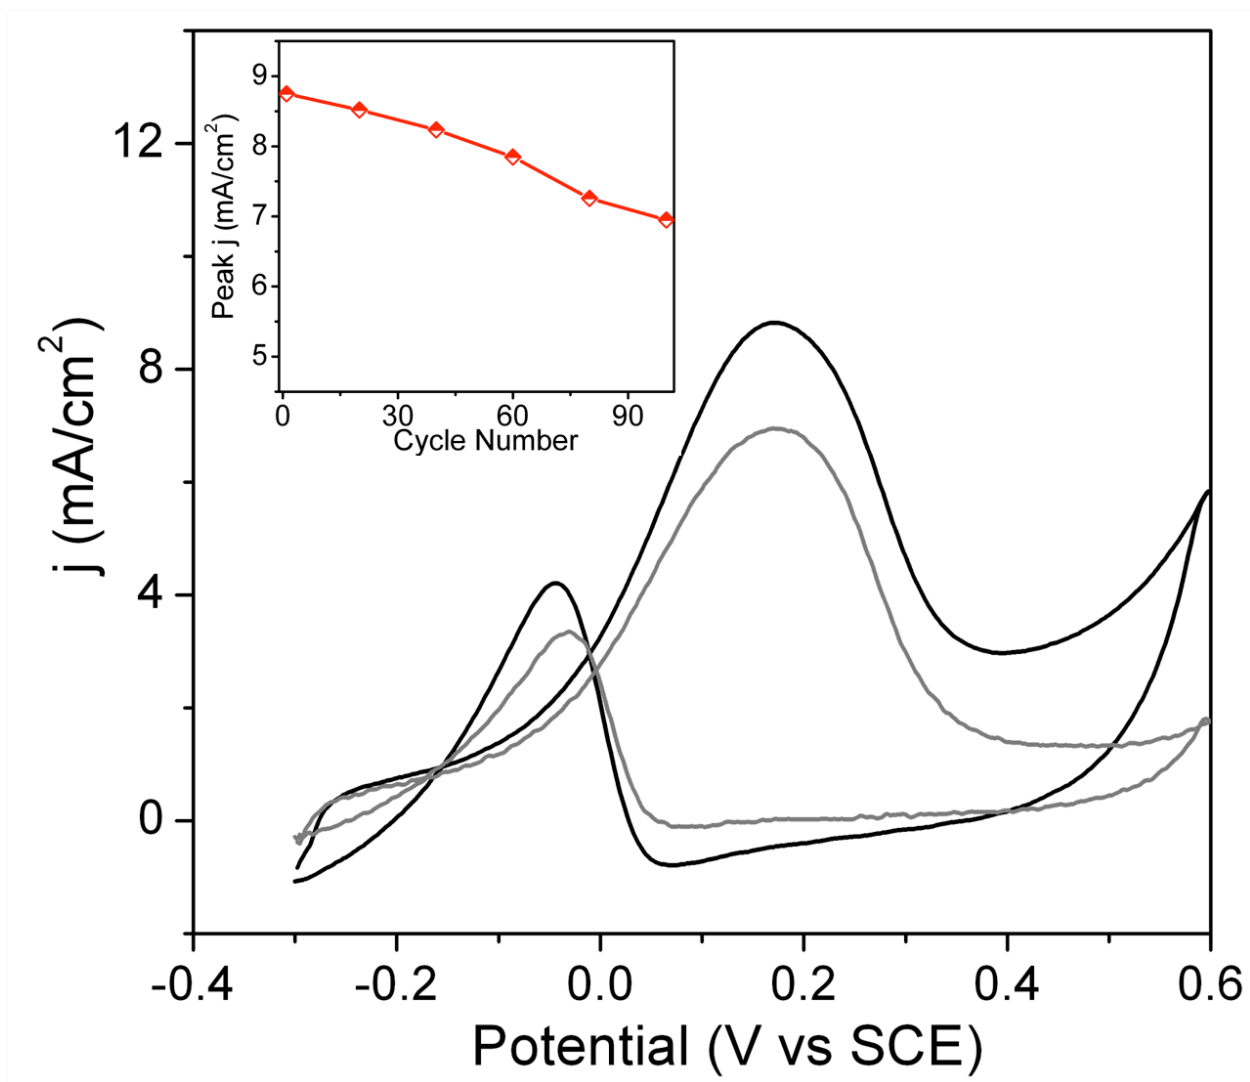

**Fig. S12** CV stability test of rGO/TiO<sub>2</sub>/AuNW, in 1 M NaOH aqueous solution containing 1.5 M ethanol, 1<sup>st</sup> and 100<sup>th</sup> cycle, inset displays peak current density versus cycle number at a scan rate 40 mV/s.

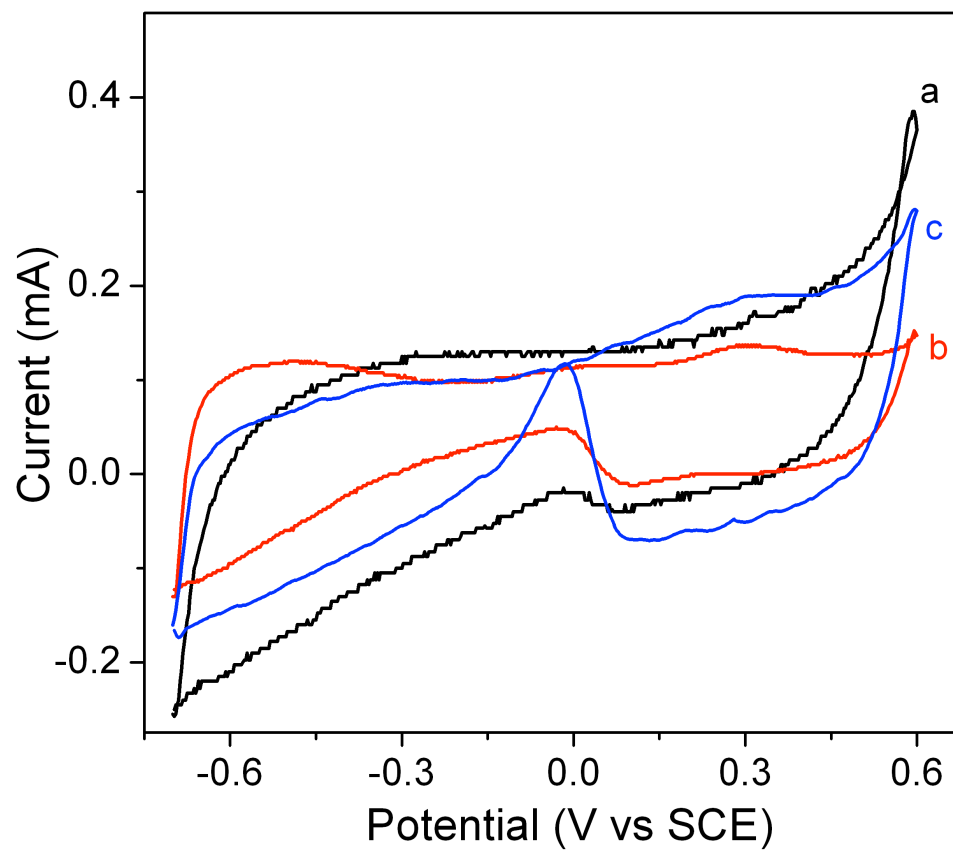

**Fig. S13** CVs for CO oxidation obtained in CO saturated 1M NaOH on (a)  $\text{TiO}_2/\text{AuNW}$ , (b)  $\text{rGO}/\text{AuNW}$  and (c)  $\text{rGO}/\text{TiO}_2/\text{AuNW}$ .

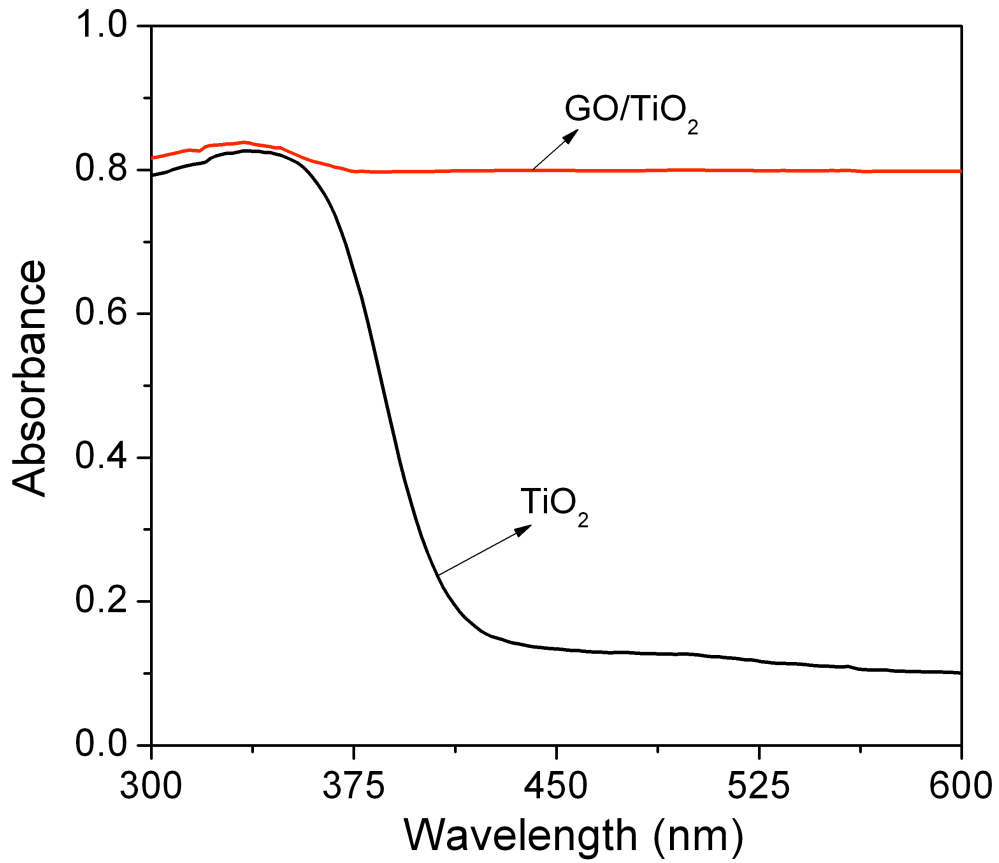

**Fig. S14** Diffuse reflectance spectra of TiO<sub>2</sub> and GO/TiO<sub>2</sub>. Enhanced absorption in the visible region is attributed to the presence of GO. Expected to boost the utilizing efficiency of solar light.

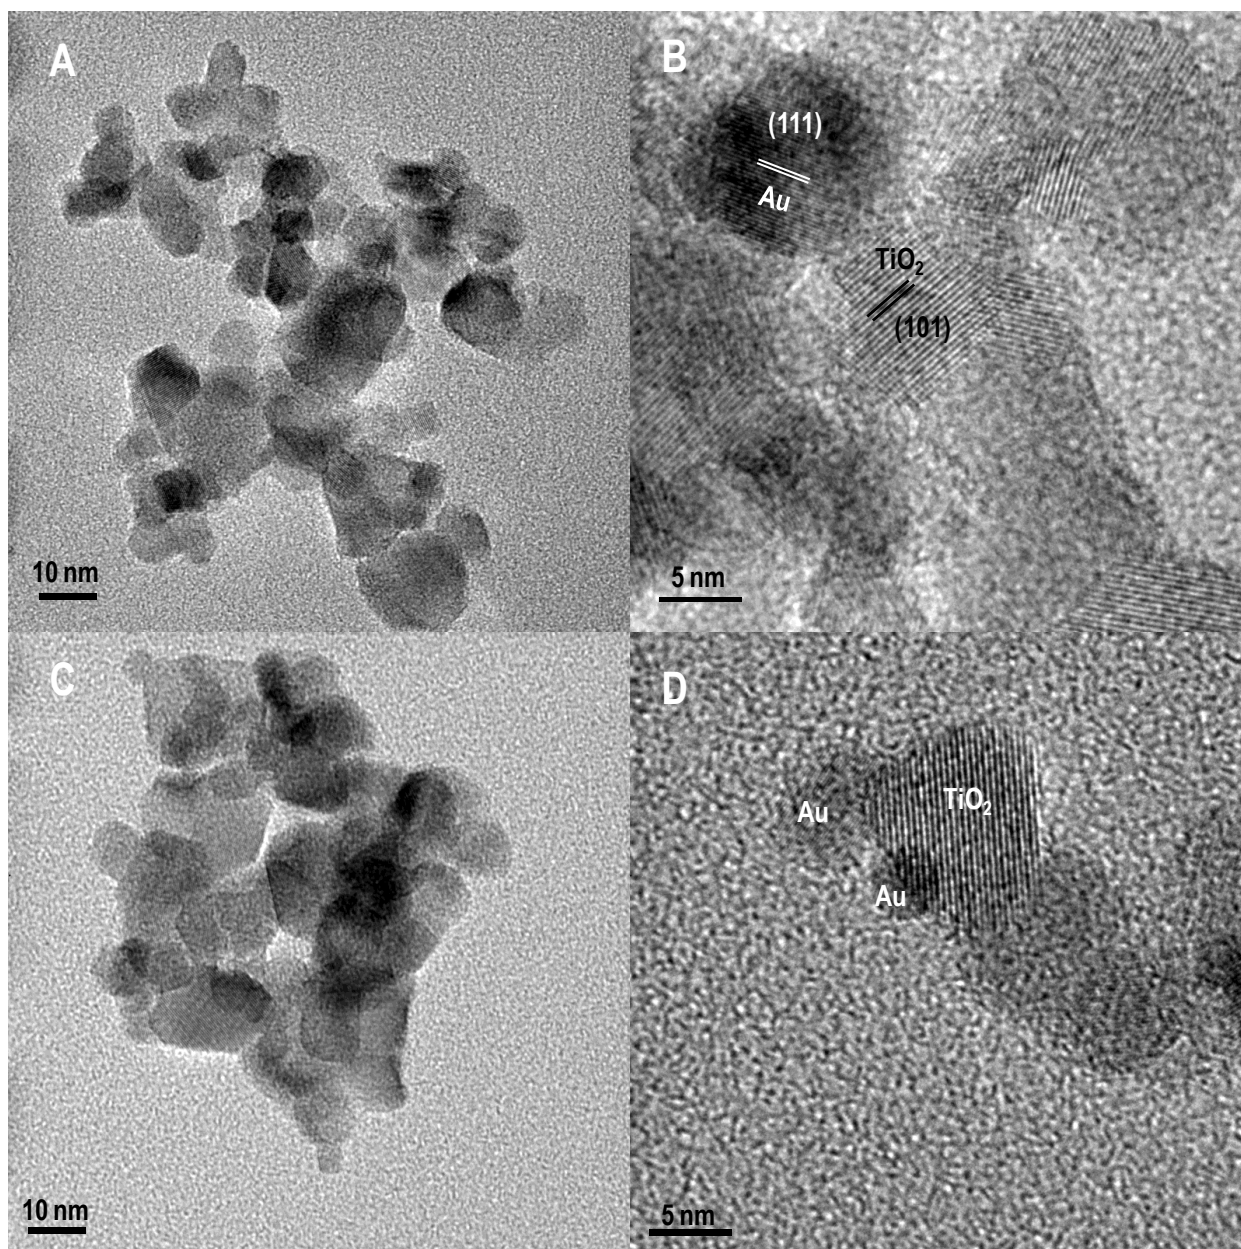

**Fig. S15** TEM micrographs (A, B) and (C, D) corresponds to Au nanoparticles nucleated on unmodified and amine modified TiO<sub>2</sub>, respectively. Marked d-spacing represents the (101) plane of TiO<sub>2</sub> and (111) plane of Au.



## References

1. I. K. Moon, J. Lee, R. S. Ruoff and H. Lee, *Nat. Commun.*, 2010, **1**, 73.
2. T. Ohsaka, F. Izumi and Y. Fujiki, *J. Raman Spectrosc.*, 1978, **7**, 321-324.
